# Supplementary material for: A holistic approach for suppression of COVID-19 spread in workplaces and universities
Source: PLOS journal article supplement (doi:10.1371/journal.pone.0254798), 2021-08-12
Supplement: S5 (10.1371/journal.pone.0254798.s005) [file journal.pone.0254798.s005]

S1 Table. Notation and formulae for parameters used in the “Community-Workplace” model.

| Model Concept                                                                                                                                                                      | Notation              |
|------------------------------------------------------------------------------------------------------------------------------------------------------------------------------------|-----------------------|
| Length of modeling simulation (days)                                                                                                                                               | L                     |
| Time (timepoint of the simulation)                                                                                                                                                 | t                     |
| “Workplace” population size (i.e., number of employees)                                                                                                                            | $N_W$                 |
| “Community” population size (i.e., number of non-employees)                                                                                                                        | $N_C$                 |
| Initial disease prevalence in the community (at the beginning of the simulation)                                                                                                   | $prv_{Ci}$            |
| Initial disease prevalence in the workplace (at the beginning of the simulation)                                                                                                   | $prv_{Wi}$            |
| Proportion of time employees spend at work (interacting only among themselves)                                                                                                     | p                     |
| Proportion of cases that develop symptoms (vs. being “asymptomatic”)                                                                                                               | q                     |
| Proportion of non-cases that report symptoms each work-day                                                                                                                         | g                     |
| Average days it takes to develop infectiousness after infection-causing exposure to virus                                                                                          | $\Delta_{infectious}$ |
| Rate of development of infectiousness ( $= 1 / \Delta_{infectious}$ )                                                                                                              | $\theta$              |
| Average days of being infectious. Equivalent to the average days taken to recover from onset of infectiousness.                                                                    | $\Delta_{recover}$    |
| Rate of recovery from onset of infectiousness ( $= 1 / \Delta_{recover}$ )                                                                                                         | $\gamma_I$            |
| Average days taken to develop symptoms after becoming infectious (for non-“asymptomatic”s)                                                                                         | $\Delta_{symptoms}$   |
| Rate of symptom development for infected individuals who become symptomatic ( $= 1 / \Delta_{symptoms}$ )                                                                          | $\lambda$             |
| Rate of recovery from onset of symptoms ( $= 1 / (\Delta_{recover} - \Delta_{symptoms})$ )                                                                                         | $\gamma_Y$            |
| Rate of recovery from moving into asymptomatic compartment ( $= 1 / (\Delta_{recover} - \Delta_{symptoms})$ )                                                                      | $\gamma_A$            |
| Days required in isolation if tested positive                                                                                                                                      | $\Delta_{isolation}$  |
| Rate of movement back to work after being detected ( $= 1 / \Delta_{isolation}$ )                                                                                                  | $\gamma_D$            |
| Average days of immunity after recovering                                                                                                                                          | $\Delta_{immunity}$   |
| Rate of loss of immunity ( $= 1 / \Delta_{immunity}$ )                                                                                                                             | $\alpha$              |
| Basic virus reproduction number (i.e., the mean number of people in a fully susceptible population that are infected with SARS-CoV-2 by a single infected person) in the workplace | $RO_W$                |
| Basic virus reproduction number (i.e., the mean number of people in a fully susceptible population that are infected with SARS-CoV-2 by a single infected person) in the community | $RO_C$                |
| Transmission rate in the workplace ( $= RO_W * \gamma_I$ )                                                                                                                         | $\beta_W$             |
| Transmission rate in the community ( $= RO_C * \gamma_I$ )                                                                                                                         | $\beta_C$             |
| Proportion of the asymptomatic workforce population tested each day                                                                                                                | $\tau_A$              |

|                                                                                                       |               |
|-------------------------------------------------------------------------------------------------------|---------------|
| Proportion of the symptomatic workforce population tested each day                                    | $\tau_\gamma$ |
| Test sensitivity (probability of an infected individual's test being positive)                        | sens          |
| Average number of tests required to return to work after infection (i.e., "testing out of isolation") | h             |
